# Supplementary material for: Exploring the fate of mRNA in aging seeds: protection, destruction, or slow decay?
Source: PubMed Central journal article supplement (PMC6093385; doi:10.1093/jxb/ery215), 2018-06-12
Supplement: jxb_69_18_4309_s8.pdf [file jxb_69_18_4309_s8.pdf]

## Supplementary Figure Legends

Figure S1. Quality control of sequence data based on ERCC transcripts. A) Average number of counts across all ten samples plotted for each transcript abundance class (22 classes, ranging from 0.0002 to 600 amol  $\mu\text{L}^{-1}$  in the dilution used for sequencing). The relationship is strongly linear, indicating that more abundant transcripts are more deeply sequenced, both for ERCC transcripts and soybean transcripts. Error bars show standard deviation. B) Variance in average number of counts across all ten samples for transcript ID (diamonds) or abundance class (squares). The data are strongly related by a quadratic function, indicating that error in the number of counts is more related to the abundance of that transcript than to any variance among the ten samples.

Figure S2. Summary of transcript filtering process. Each panel shows the number of soybean transcripts retained after each step. Embryonic axis color indicates harvest year: 1994 (orange) and 2015 (green). Numbers in parentheses indicate how many transcripts were retained from the 92 transcripts in the ERCC Spike-In mix, which have different sequence lengths (from 273 to 2,022 bp), GC contents (from 30.8 to 52.7%), and abundances (from 0.0003 to 600 amol  $\mu\text{L}^{-1}$ , as diluted for sequencing).

Figure S3. Comparison of sequenced transcript length to reference transcript length in the 11,729 transcripts sequenced in all 10 samples. A) Transcripts where the read alignments from 1994H samples covered at least 75% of the reference transcript (6,988 transcripts). B) Sequenced transcript length of the same 6,988 transcripts in 2015H samples. Strong positive linear correlations hold in both cases, with slope  $\approx 1$  and  $R^2 > 0.95$ . In Panels C and D, the sequenced and actual transcript lengths are compared for the remaining 4,741 transcripts in 1994H samples (C) and 2015H samples (D). A much weaker linear correlation holds in both cases, with slope  $\neq 1$  and  $R^2 \approx 0.41$ .

Figure S4. Example of alternative splicing-like coverage pattern. Coverage map of an example transcript in Figure 5, region D (Glyma.15G091400) showing a signal of possible alternative splicing (exon skipping), evident in the abrupt drop in coverage between basepairs 306 and 407 (arrows), followed by a return to initial coverage level. The terminal RNA bases of the skipped exon are 5'-GU and AG-3'. Mean proportional

depth (%) is shown at each position in the transcript (bp) for 1994H (orange line) and 2015H (green line) samples, with standard deviation for each shown in gray.

Figure S5. Coverage maps of transcripts chosen for qPCR assay. Mean proportional depth (%) is shown at each position in the transcript (bp) for 1994H (orange line) and 2015H (green line) samples, with standard deviation for each shown in gray. Transcripts shown in A-C were chosen to represent transcripts that are intact in both harvest years (“intact” transcripts, Fig. 5 Region A), while transcripts shown in D-F were chosen to represent transcripts showing degradation in 1994H samples relative to 2015H samples (“degradation-prone” transcripts, Fig. 5 Region B).

Figure S6. Schematic of transcripts and amplicons. Each bar indicates the full length of the transcript. Each arrow indicates the location and directionality of a primer. Panel A shows intact transcripts chosen from Fig. 5, Region A; Panel B shows degradation-prone transcripts chosen from Fig. 5, Region B. Figure is to scale; scale bar, 100 bp.

Figure S7. Expected qPCR results. A-G model the outcomes of both cDNA synthesis and qPCR for different library preparations performed with intact (A, D, F) or fragmented (B, C, E, G) mRNA using oligo(dT) primers (A, B, C) or random hexamer primers (D, E, F, G) and total RNA (A, C, F, G) or poly(A)-selected mRNA (A, B, D, E) as the template. Blue bar = template mRNA. Purple arrow = primer for cDNA synthesis. Green bar = cDNA. Red arrows = primers for qPCR. Black bars = qPCR amplicons at the same cycle number. When more starting template is present, faster amplification results in a lower Ct value. In H, expected results of  $\Delta C_t$  calculations for each of A-G are shown, facilitating comparison between the results shown in Figure 6.

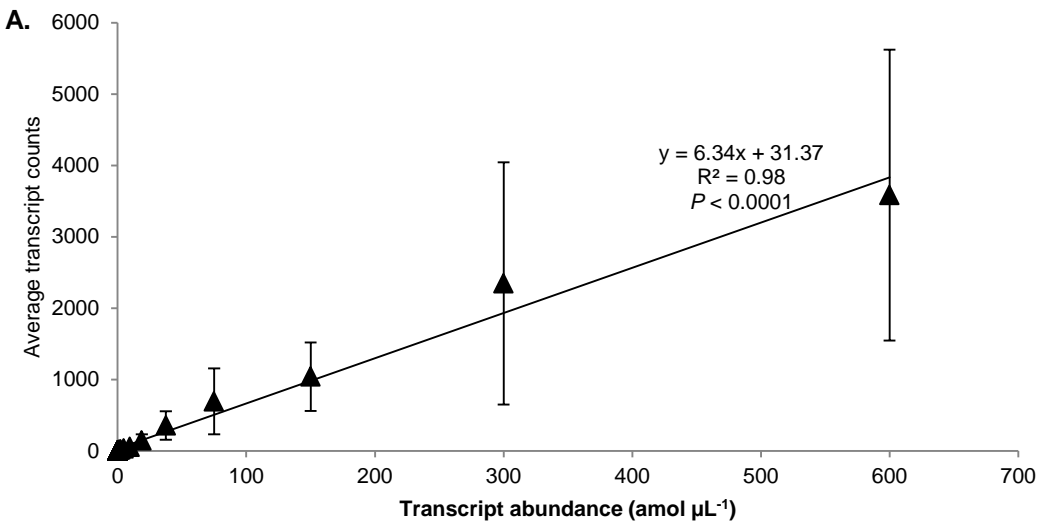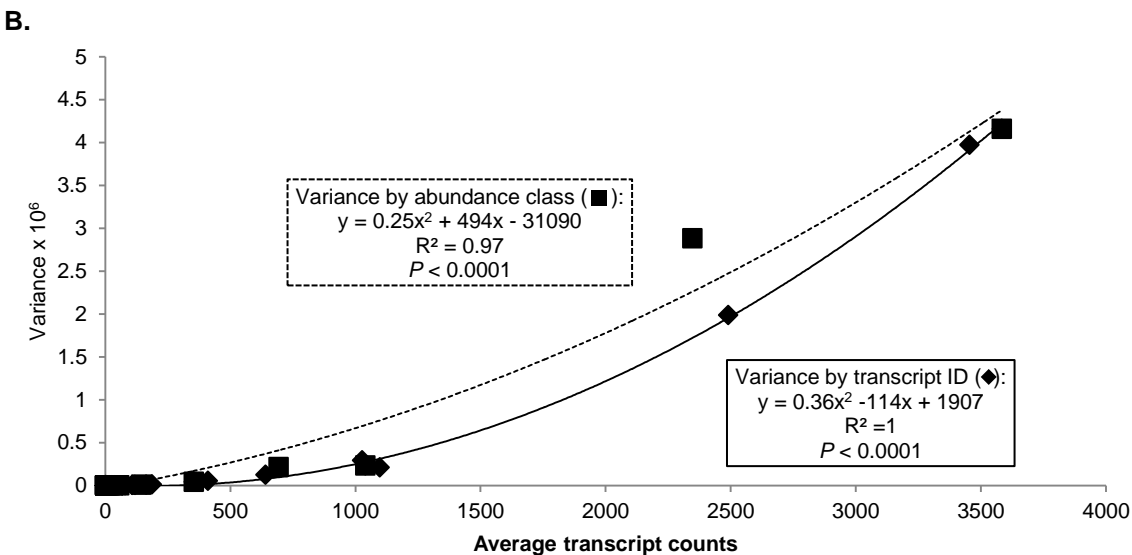

Figure S1. Quality control of sequence data based on ERCC transcripts. A) Average number of counts across all ten samples plotted for each transcript abundance class (22 classes, ranging from 0.0002 to 600  $\text{amol } \mu\text{L}^{-1}$  in the dilution used for sequencing). The relationship is strongly linear, indicating that more abundant transcripts are more deeply sequenced, both for ERCC transcripts and soybean transcripts. Error bars show standard deviation. B) Variance in average number of counts across all ten samples for transcript ID (diamonds) or abundance class (squares). The data are strongly related by a quadratic function, indicating that error in the number of counts is more related to the abundance of that transcript than to any variance among the ten samples.

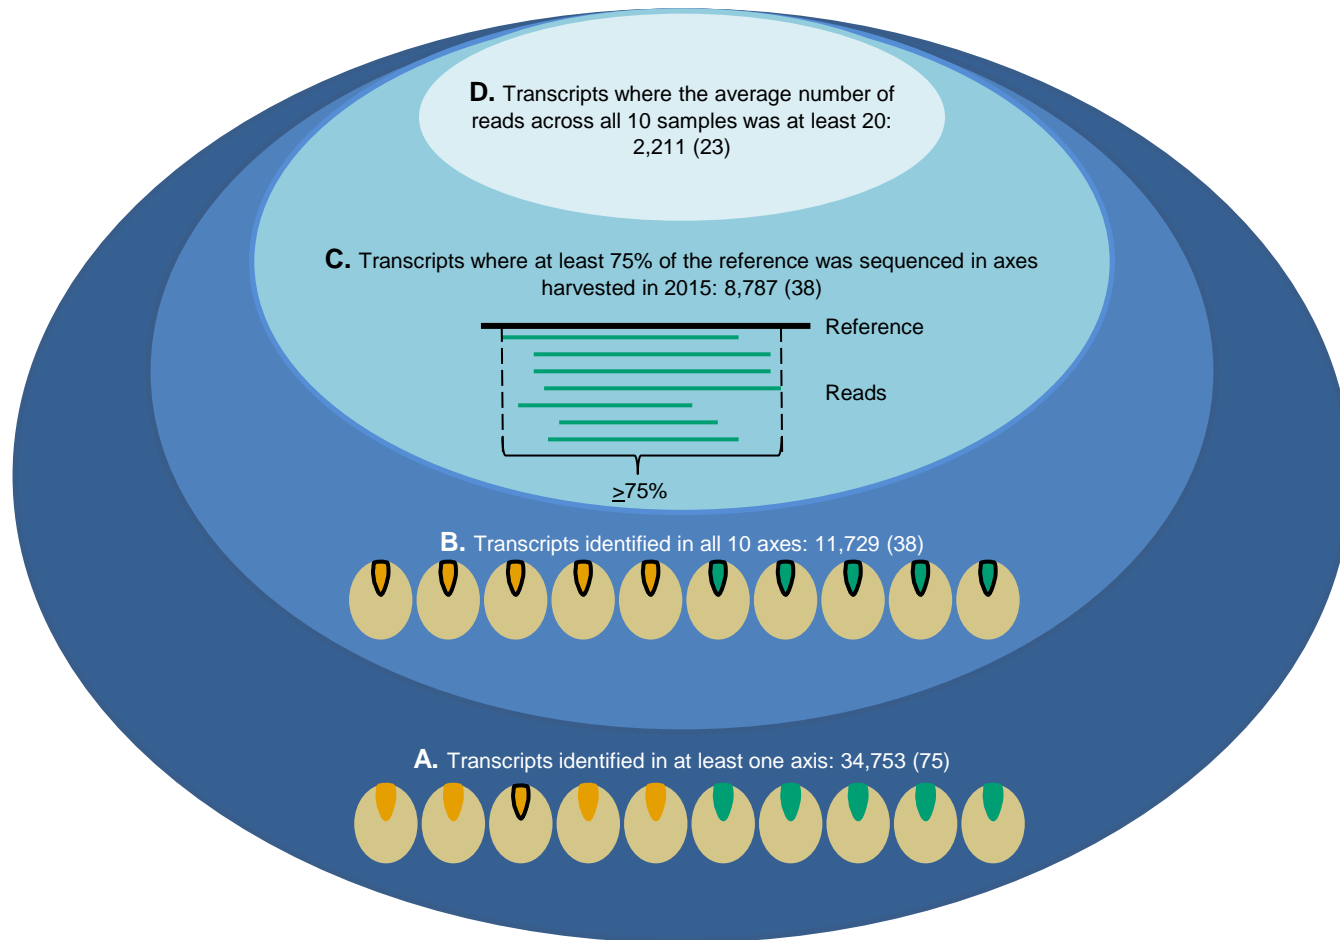

Figure S2. Summary of transcript filtering process. Each panel shows the number of soybean transcripts retained after each step. Embryonic axis color indicates harvest year: 1994 (orange) and 2015 (green). Numbers in parentheses indicate how many transcripts were retained from the 92 transcripts in the ERCC Spike-In mix, which have different sequence lengths (from 273 to 2,022 bp), GC contents (from 30.8 to 52.7%), and abundances (from 0.0003 to 600 amol  $\mu\text{L}^{-1}$ , as diluted for sequencing).

**A. Transcripts in 1994H seeds with >75% sequenced (6,988 transcripts)**

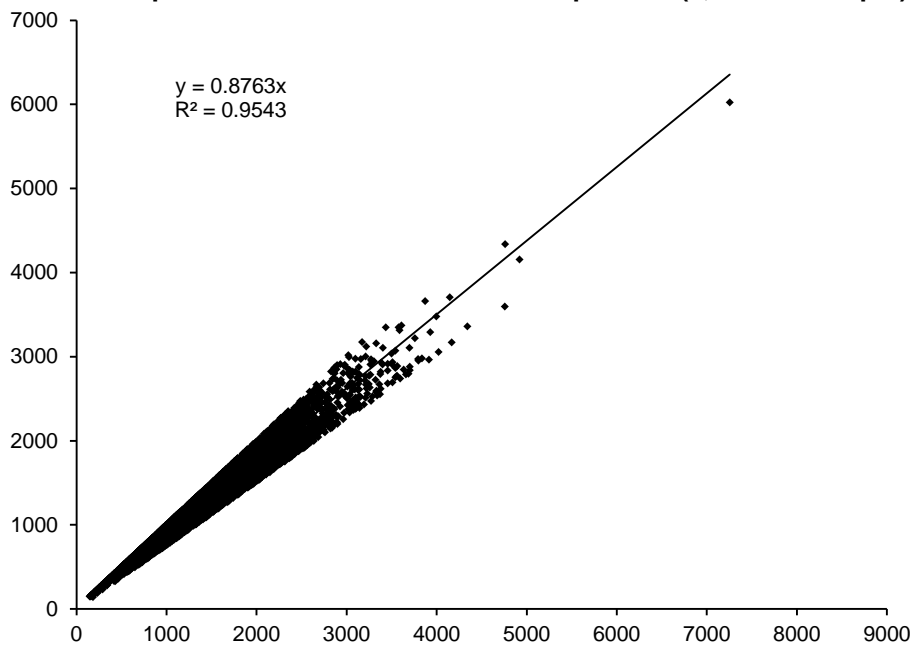

**B. Coverage in 2015H seeds of the same transcripts as shown in A**

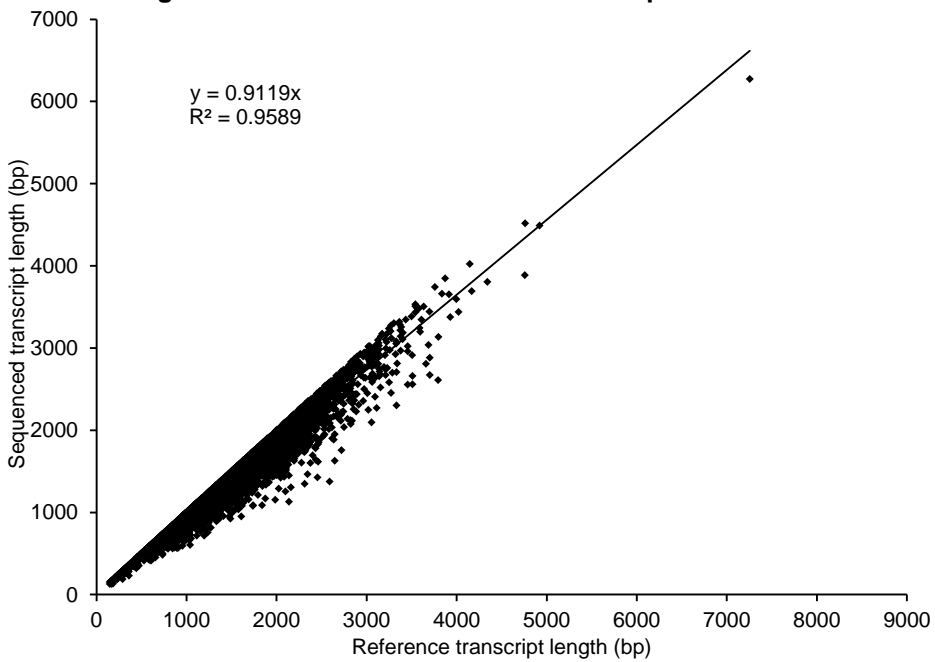

**C. Coverage of remaining 4,741 transcripts in 1994H seeds**

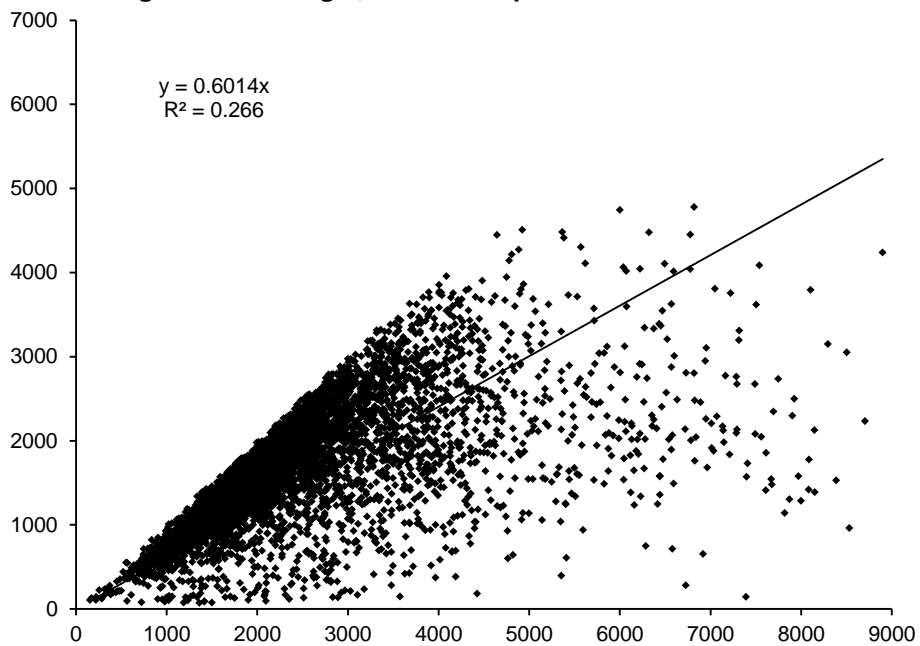

**D. Coverage of remaining 4,741 transcripts in 2015H seeds**

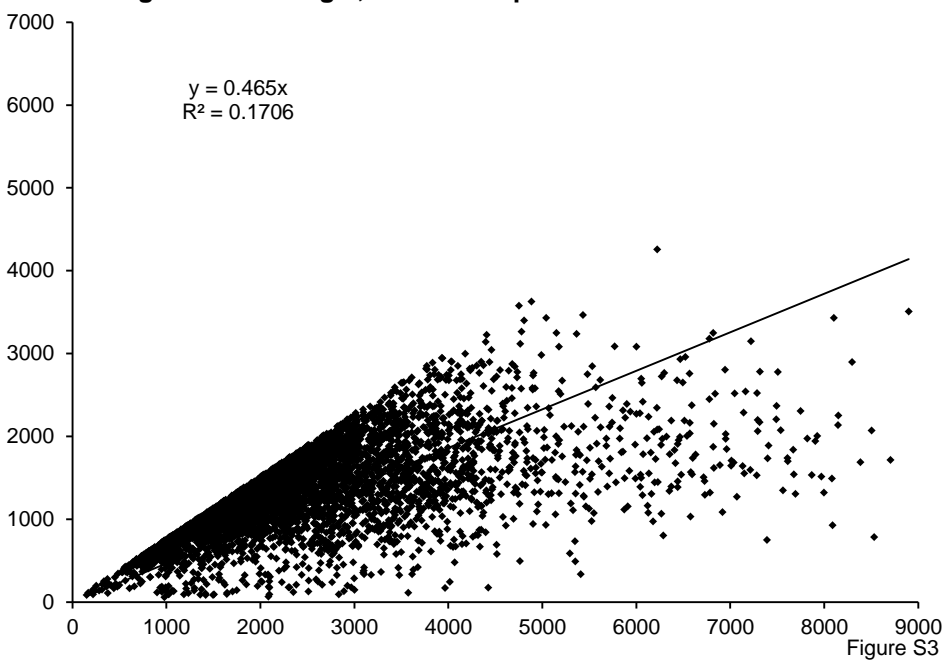

Figure S3. Comparison of sequenced transcript length to reference transcript length in the 11,729 transcripts sequenced in all 10 samples. A) Transcripts where the read alignments from 1994H samples covered at least 75% of the reference transcript (6,988 transcripts). B) Sequenced transcript length of the same 6,988 transcripts in 2015H samples. Strong positive linear correlations hold in both cases, with slope  $\approx 1$  and  $R^2 > 0.95$ . In Panels C and D, the sequenced and actual transcript lengths are compared for the remaining 4,741 transcripts in 1994H samples (C) and 2015H samples (D). A much weaker linear correlation holds in both cases, with slope  $\neq 1$  and  $R^2 \approx 0.41$ .

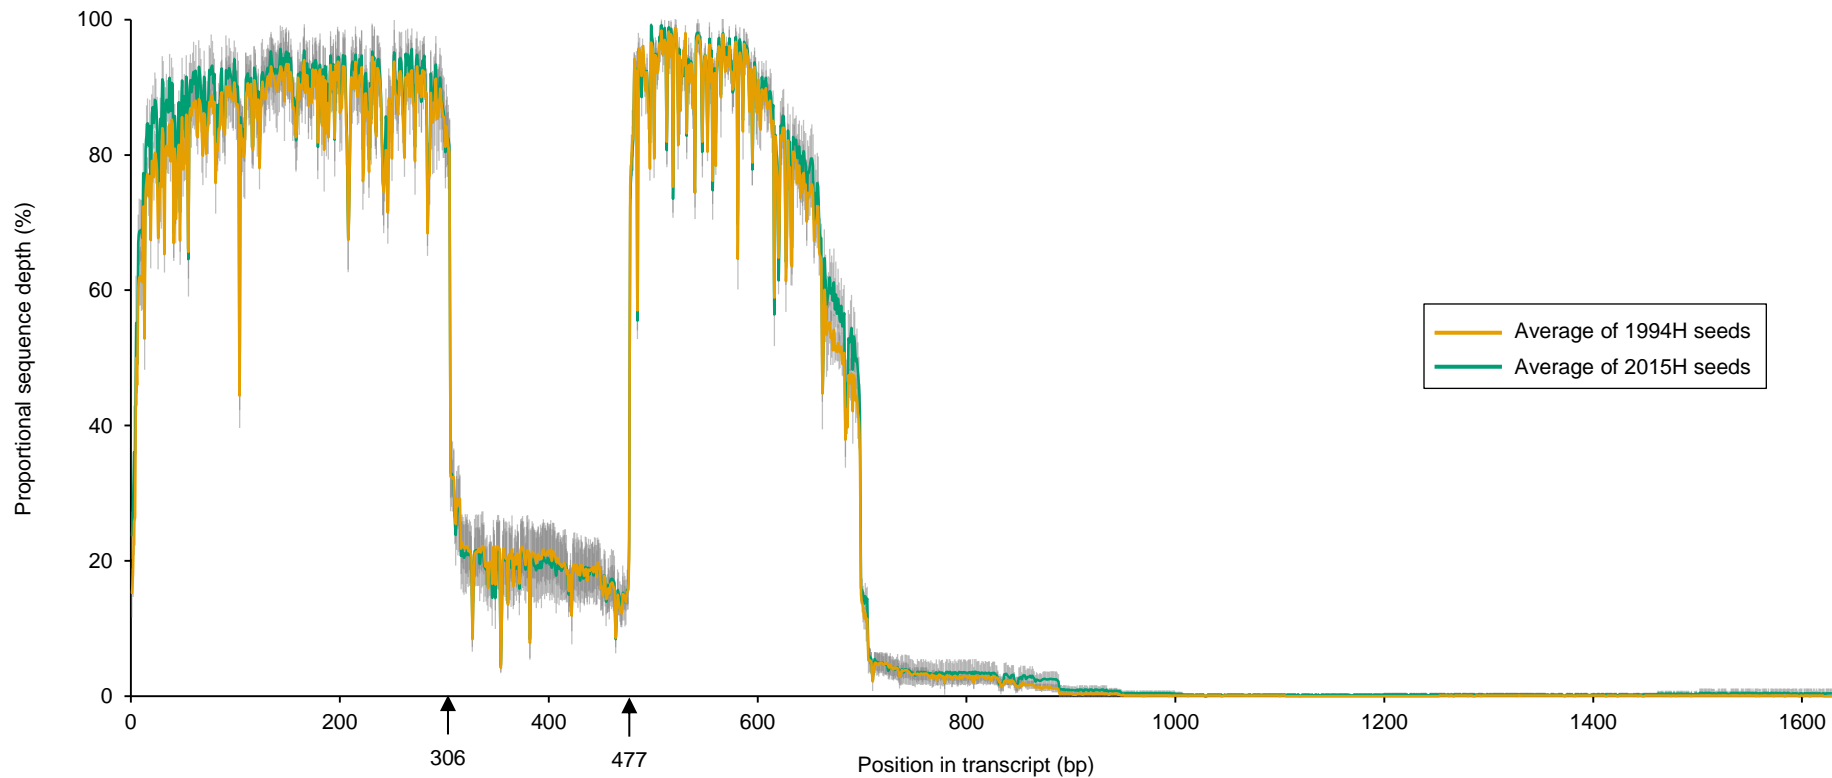

Figure S4. Example of alternative splicing-like coverage pattern. Coverage map of an example transcript in Figure 5, region D (Glyma.15G091400) showing a signal of possible alternative splicing (exon skipping), evident in the abrupt drop in coverage between basepairs 306 and 477 (arrows), followed by a return to initial coverage level. The terminal RNA bases of the skipped exon are 5'-GU and AG-3'. Mean proportional depth (%) is shown at each position in the transcript (bp) for 1994H (orange line) and 2015H (green line) samples, with standard deviation for each shown in gray.

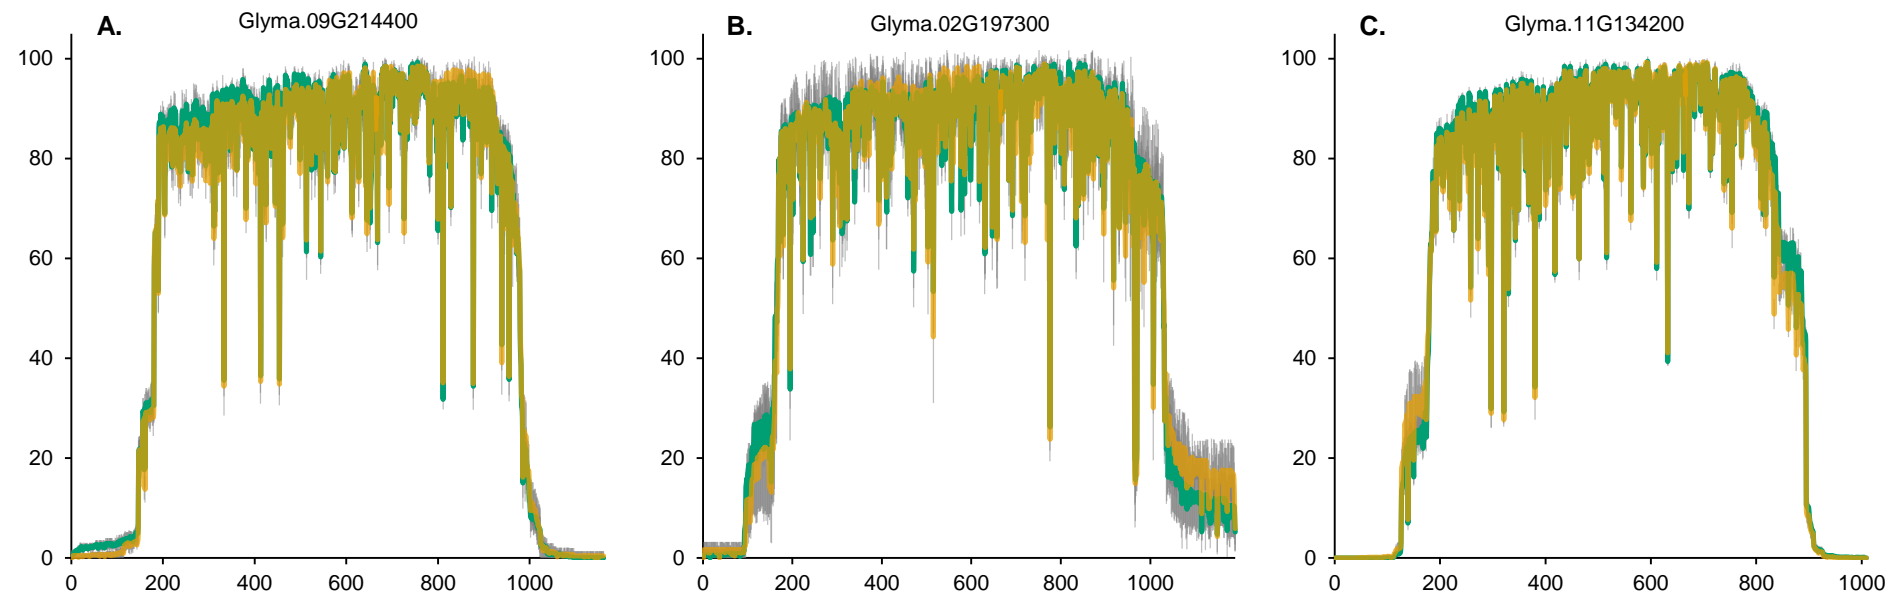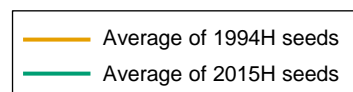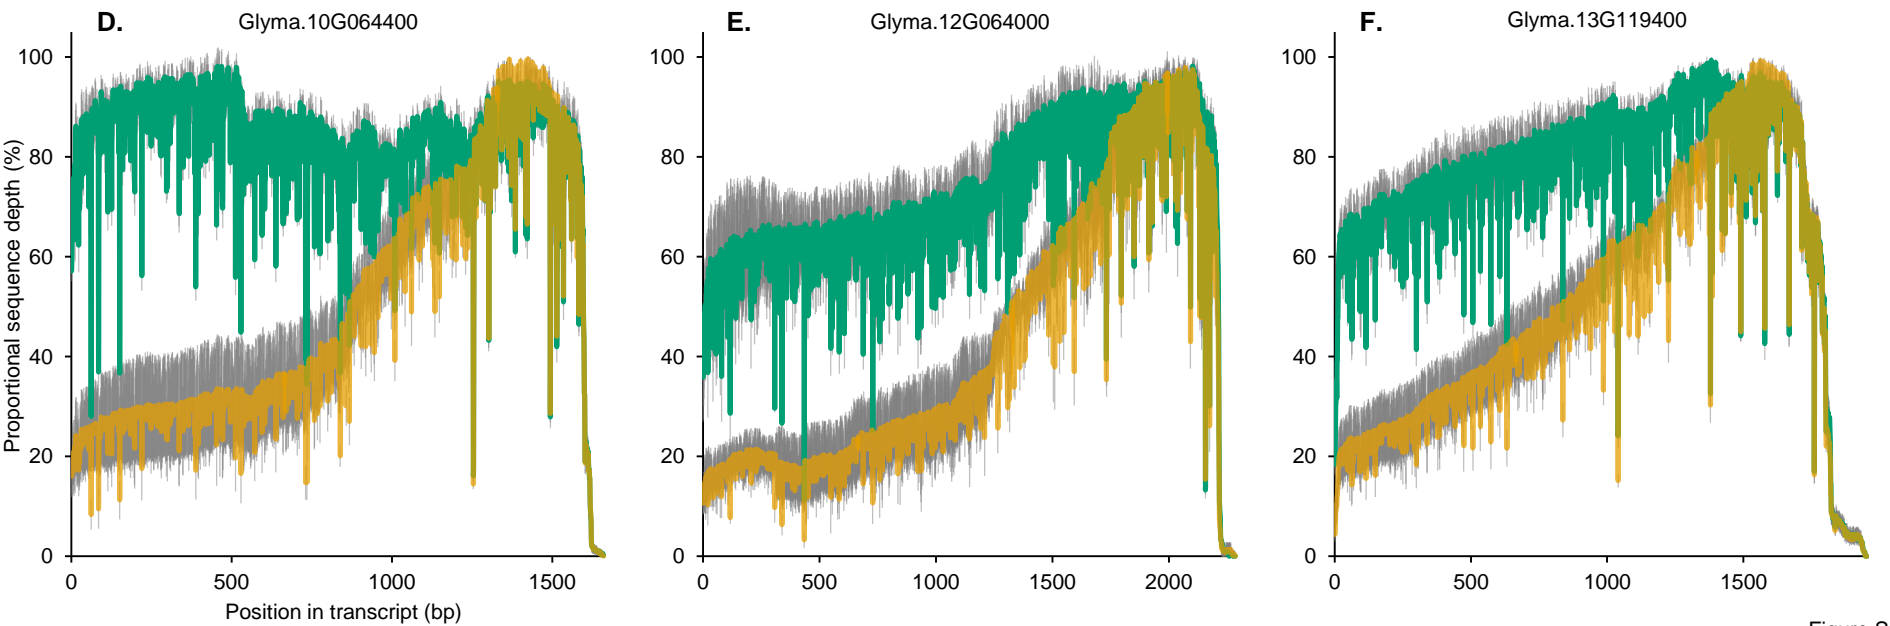



Figure S5. Coverage maps of transcripts chosen for qPCR assay. Mean proportional depth (%) is shown at each position in the transcript (bp) for 1994H (orange line) and 2015H (green line) samples, with standard deviation for each shown in gray. Transcripts shown in A-C were chosen to represent transcripts that are intact in both harvest years (“intact” transcripts, Fig. 5 Region A), while transcripts shown in D-F were chosen to represent transcripts showing degradation in 1994H samples relative to 2015H samples (“degradation-prone” transcripts, Fig. 5 Region B).

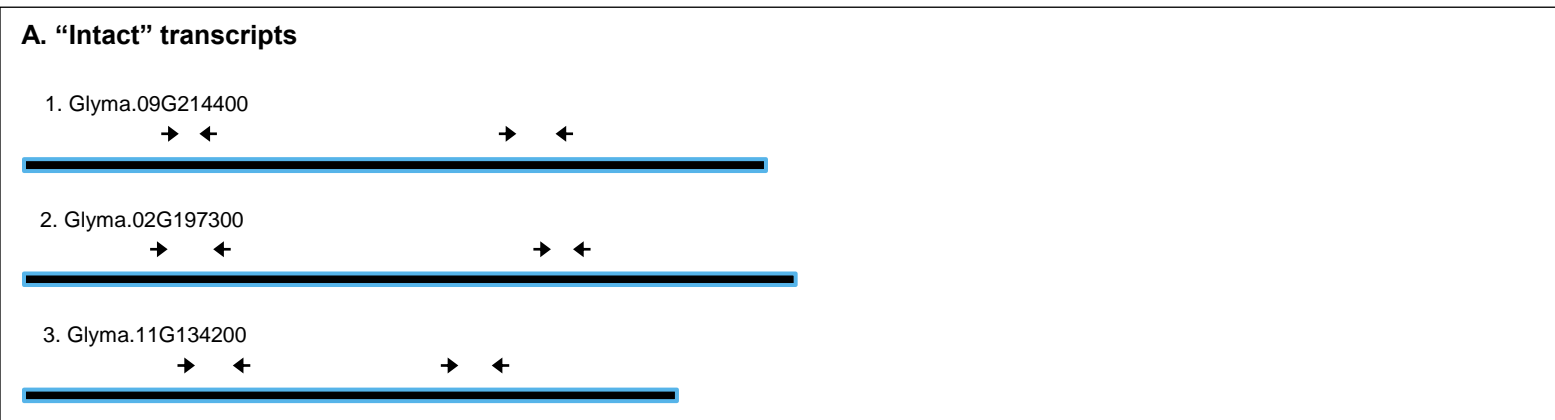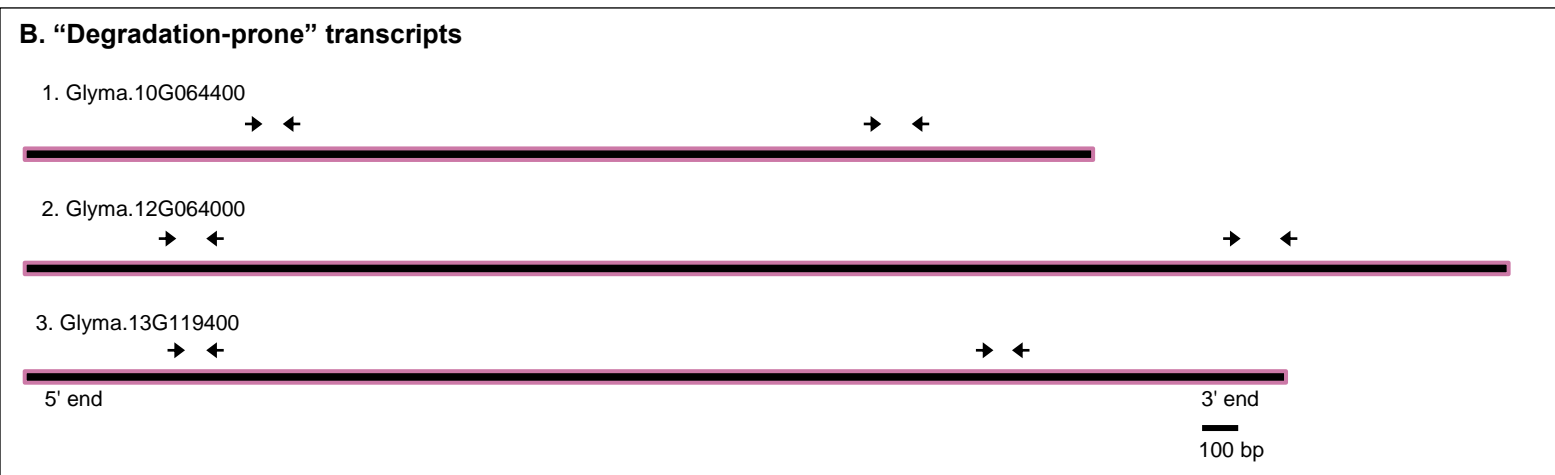

Figure S6. Schematic of transcripts and amplicons. Each bar indicates the full length of the transcript. Each arrow indicates the location and directionality of a primer. Panel A shows intact transcripts chosen from Fig. 5, Region A; Panel B shows degradation-prone transcripts chosen from Fig. 5, Region B. Figure is to scale; scale bar, 100 bp.

A. Oligo(dT) cDNA synthesis with intact poly-A selected mRNA or total RNA

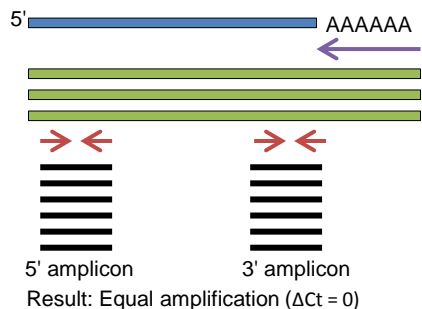

B. Oligo(dT) cDNA synthesis with fragmented poly-A selected mRNA

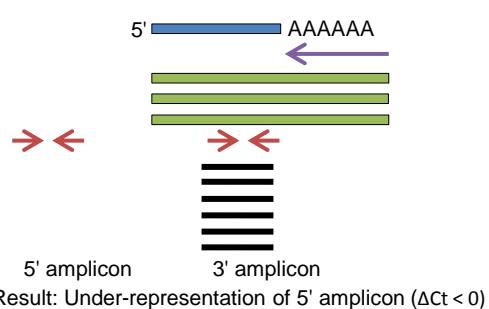

C. Oligo(dT) cDNA synthesis with fragmented total mRNA

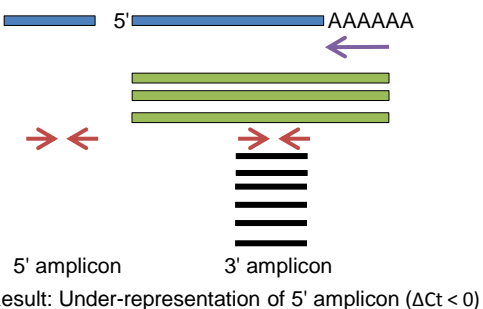

D. Random hexamer cDNA synthesis with intact poly-A selected mRNA

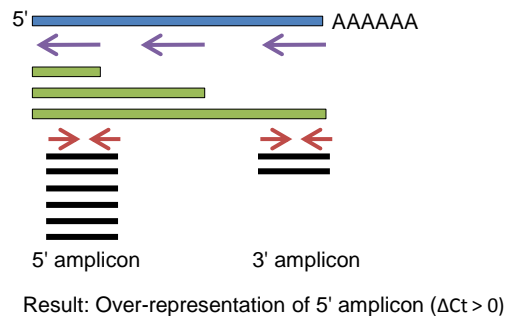

E. Random hexamer cDNA synthesis with fragmented poly-A selected mRNA

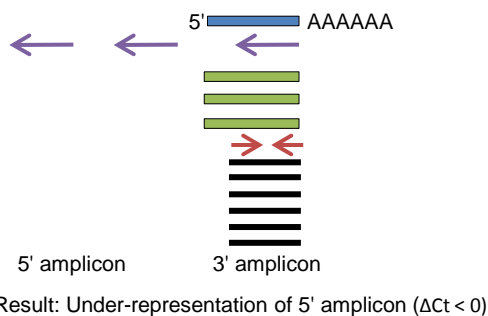

F. Random hexamer cDNA synthesis with intact total mRNA

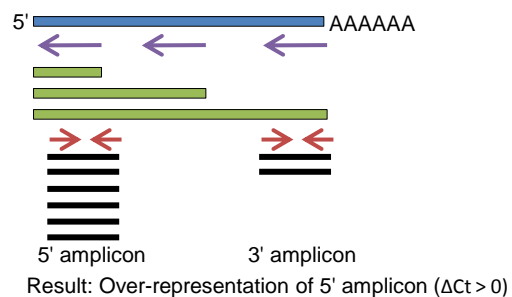

G. Random hexamer cDNA synthesis with fragmented total mRNA

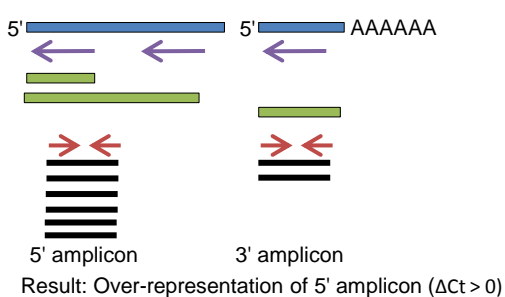

H. Oligo(dT) primers and poly-A selected mRNA or total RNA      Random hexamer primers and poly-A selected mRNA      Random hexamer primers and total RNA

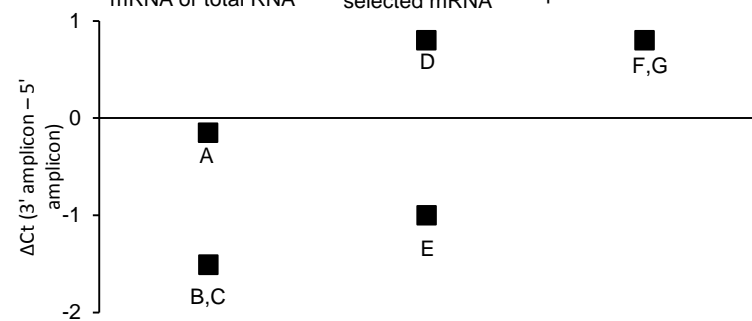

Figure S7. Expected qPCR results. A-G model the outcomes of both cDNA synthesis and qPCR for different library preparations performed with intact (A, D, F) or fragmented (B, C, E, G) mRNA using oligo(dT) primers (A, B, C) or random hexamer primers (D, E, F, G) and total RNA (A, C, F, G) or poly(A)-selected mRNA (A, B, D, E) as the template. Blue bar = template mRNA. Purple arrow = primer for cDNA synthesis. Green bar = cDNA. Red arrows = primers for qPCR. Black bars = qPCR amplicons at the same cycle number. When more starting template is present, faster amplification results in a lower Ct value. In H, expected results of  $\Delta Ct$  calculations for each of A-G are shown, facilitating comparison between the results shown in Figure 6.

Table S1. Transcript names and annotations for transcripts exclusive to 1994H or 2015H seeds. Transcripts in A were sequenced in all five 1994H seeds; transcripts in B were sequenced in all five 2015H seeds. Transcript annotations were obtained from Schmutz *et al.* (2010).

|                 | Transcript ID                                         | Transcript annotation                                                                       |
|-----------------|-------------------------------------------------------|---------------------------------------------------------------------------------------------|
| A               | Glyma.01G014700                                       | Transcription factor jumonji (jmi) family protein / zinc finger (C5HC2 type) family protein |
|                 | Glyma.01G081100                                       | Integrase-type DNA-binding superfamily protein                                              |
|                 | Glyma.08G087300                                       | copper-exporting ATPase / responsive-to-antagonist 1 / copper-transporting ATPase (RAN1)    |
|                 | Glyma.08G227200                                       | calmodulin-domain protein kinase cdpk isoform 2                                             |
|                 | Glyma.16G023200                                       | Tetratricopeptide repeat (TPR)-like superfamily protein                                     |
|                 | Glyma.18G160300                                       | <i>No annotation</i>                                                                        |
|                 | Glyma.20G073500                                       | MUTL protein homolog 1                                                                      |
|                 | Glyma.20G196900                                       | Fe superoxide dismutase 2                                                                   |
| B               | Glyma.01G034700                                       | TRICHOME BIREFRINGENCE-LIKE 27                                                              |
|                 | Glyma.03G030900                                       | cytochrome P450, family 83, subfamily B, polypeptide 1                                      |
|                 | Glyma.03G078700                                       | plasma membrane intrinsic protein 1;4                                                       |
|                 | Glyma.10G292900                                       | Nitrilase/cyanide hydratase and apolipoprotein N-acyltransferase family protein             |
|                 | Glyma.11G184500                                       | S-adenosyl-L-methionine-dependent methyltransferases superfamily protein                    |
|                 | Glyma.11G230000                                       | Phosphoinositide-specific phospholipase C family protein                                    |
|                 | Glyma.12G129900                                       | <i>No annotation</i>                                                                        |
|                 | Glyma.13G143200                                       | SAUR-like auxin-responsive protein family                                                   |
| Glyma.19G022700 | Disease resistance protein (TIR-NBS-LRR class) family |                                                                                             |

Table S2. Transcripts longer than 9000 bp sequenced in all 10 samples. %, percent of transcript sequenced. Transcript annotations were obtained from Schmutz *et al.* (2010).

| Transcript ID   | Transcript annotation                                                                              | Transcript length (bp) | Sequenced bases (bp) | %  |
|-----------------|----------------------------------------------------------------------------------------------------|------------------------|----------------------|----|
| Glyma.07G035600 | ATPases; nucleotide binding; ATP binding; nucleoside-triphosphatases; transcription factor binding | 16,968                 | 2413                 | 14 |
| Glyma.16G004800 | ATPases; nucleotide binding; ATP binding; nucleoside-triphosphatases; transcription factor binding | 16,860                 | 3575                 | 21 |
| Glyma.18G275200 | Auxin transport protein (BIG)                                                                      | 15,829                 | 2894                 | 18 |
| Glyma.08G252600 | Auxin transport protein (BIG)                                                                      | 15,259                 | 3028                 | 20 |
| Glyma.11G039900 | Pleckstrin homology (PH) domain-containing protein                                                 | 13,842                 | 2254                 | 16 |
| Glyma.11G077000 | Phosphatidylinositol 3- and 4-kinase family protein with FAT domain                                | 12,488                 | 2645                 | 21 |
| Glyma.01G166400 | Phosphatidylinositol 3- and 4-kinase family protein with FAT domain                                | 12,365                 | 1808                 | 15 |
| Glyma.11G123500 | Target of rapamycin                                                                                | 12,313                 | 2337                 | 19 |
| Glyma.07G252100 | P-loop containing nucleoside triphosphate hydrolases superfamily protein                           | 12,033                 | 3899                 | 32 |
| Glyma.08G087600 | Ubiquitin-protein ligase 1                                                                         | 12,005                 | 2544                 | 21 |
| Glyma.05G133100 | Ubiquitin-protein ligase 1                                                                         | 11,916                 | 3987                 | 33 |
| Glyma.02G216000 | Ubiquitin-protein ligase 1                                                                         | 11,528                 | 1993                 | 17 |
| Glyma.17G022300 | P-loop containing nucleoside triphosphate hydrolases superfamily protein                           | 11,159                 | 2602                 | 23 |
| Glyma.06G098700 | Ubiquitin-protein ligase 1                                                                         | 10,917                 | 2053                 | 19 |
| Glyma.14G142900 | ENTH/VHS/GAT family protein                                                                        | 10,869                 | 2097                 | 19 |
| Glyma.04G096100 | Binding                                                                                            | 10,658                 | 2871                 | 27 |
| Glyma.14G143000 | ENTH/VHS/GAT family protein                                                                        | 10,327                 | 1324                 | 13 |
| Glyma.05G185300 | <i>No annotation</i>                                                                               | 10,272                 | 2012                 | 20 |
| Glyma.16G144200 | Protein of unknown function (DUF1162)                                                              | 9624                   | 1316                 | 14 |

|                 |                                                                                  |      |      |    |
|-----------------|----------------------------------------------------------------------------------|------|------|----|
| Glyma.17G197200 | <i>No annotation</i>                                                             | 9457 | 2682 | 28 |
| Glyma.14G135900 | <i>No annotation</i>                                                             | 9194 | 3459 | 38 |
| Glyma.13G174600 | Protein of unknown function (DUF1162)                                            | 9071 | 2195 | 24 |
| Glyma.06G098300 | Golgi-body localization protein domain; RNA pol II promoter Fmp27 protein domain | 9025 | 1584 | 17 |

Table S3. Transcripts with unexpected decay profiles given their length. A) Transcripts found in Figure 5, region A. B) Transcripts found in Figure 5, region B.  $RD_{2015}$ , degradation of 2015H samples relative to an intact transcript;  $RD_{\Delta}$ , degradation of 1994H samples relative to 2015H samples. Transcript annotations were obtained from Schmutz *et al.* (2010).

|   | Transcript ID   | Length (bp) | $RD_{2015}$ | $RD_{\Delta}$ | Transcript annotation                                                  |
|---|-----------------|-------------|-------------|---------------|------------------------------------------------------------------------|
|   | Glyma.08G346500 | 1236        | 0.11        | 0.00          | Ribosomal protein S8e family protein                                   |
| A | Glyma.12G024700 | 1224        | 0.11        | 0.01          | Rotamase CYP 3 protein                                                 |
|   | Glyma.13G116300 | 1210        | 0.10        | 0.02          | Transmembrane protein 14C                                              |
|   | Glyma.02G049300 | 1112        | 0.15        | 0.16          | Ribosomal protein L2 family                                            |
|   | Glyma.10G257200 | 1010        | 0.13        | 0.15          | <i>No annotation</i>                                                   |
|   | Glyma.13G064900 | 1188        | 0.19        | 0.17          | Voltage dependent anion channel 1                                      |
| B | Glyma.13G237700 | 1021        | 0.20        | 0.24          | Late embryogenesis abundant protein                                    |
|   | Glyma.15G191100 | 737         | 0.17        | 0.15          | <i>No annotation</i>                                                   |
|   | Glyma.16G112800 | 2572        | 0.19        | 0.23          | RNA polymerase I specific transcription initiation factor RRN3 protein |



Table S4. GC content in each region of Figure 5. GC contents show mean  $\pm$  standard error for transcripts in that region. Different letters indicate  $P < 0.05$  (Tukey's HSD).

| Region | Transcript degradation                    | Number of transcripts | GC content (%)                |
|--------|-------------------------------------------|-----------------------|-------------------------------|
| A      | intact in 2015H and 1994H                 | 198                   | 42 $\pm$ 0.003 <sup>a</sup>   |
| B      | intact in 2015H, degraded in 1994H        | 114                   | 44 $\pm$ 0.003 <sup>c</sup>   |
| C      | degraded in 2015H, more degraded in 1994H | 99                    | 43 $\pm$ 0.003 <sup>b,c</sup> |
| D      | degraded in 2015H and 1994H               | 104                   | 42 $\pm$ 0.005 <sup>a</sup>   |
| none   | variable                                  | 1719                  | 43 $\pm$ 0.0008 <sup>b</sup>  |

Table S5. Over-represented GO terms for region C in the molecular function GO domain. Over-representation was determined by the PANTHER Overrepresentation test using a Bonferroni correction for multiple testing, with a cutoff of  $P < 0.05$ . Ref. = number of the 1821 annotated curated transcripts with this annotation; Reg. C = number of the 91 annotated transcripts in region C with this annotation; FE = Fold Enrichment, tri-P = triphosphate. Annotations are listed hierarchically, with the most specific (child) annotations in bold, and parent annotations successively indented.

| Transcript annotation               | GO ID             | Ref. (1821) | Reg. C (91) | FE          | P-value         |
|-------------------------------------|-------------------|-------------|-------------|-------------|-----------------|
| <b>ATP binding</b>                  | <b>GO:0005524</b> | <b>113</b>  | <b>22</b>   | <b>3.90</b> | <b>9.78E-06</b> |
| adenyl ribonucleotide binding       | GO:0032559        | 113         | 22          | 3.90        | 9.78E-06        |
| adenyl nucleotide binding           | GO:0030554        | 114         | 22          | 3.86        | 1.14E-05        |
| purine nucleotide binding           | GO:0017076        | 142         | 26          | 3.66        | 1.36E-06        |
| nucleotide binding                  | GO:0000166        | 159         | 28          | 3.52        | 6.72E-07        |
| nucleoside phosphate binding        | GO:1901265        | 159         | 28          | 3.52        | 6.72E-07        |
| heterocyclic compound binding       | GO:1901363        | 556         | 47          | 1.69        | 7.25E-03        |
| binding                             | GO:0005488        | 727         | 55          | 1.51        | 2.08E-02        |
| organic cyclic compound binding     | GO:0097159        | 556         | 47          | 1.69        | 7.25E-03        |
| small molecule binding              | GO:0036094        | 172         | 29          | 3.37        | 8.47E-07        |
| purine ribonucleotide binding       | GO:0032555        | 141         | 26          | 3.69        | 1.17E-06        |
| ribonucleotide binding              | GO:0032553        | 142         | 26          | 3.66        | 1.36E-06        |
| carbohydrate derivative binding     | GO:0097367        | 143         | 26          | 3.64        | 1.57E-06        |
| purine ribonucleoside tri-P binding | GO:0035639        | 141         | 26          | 3.69        | 1.17E-06        |
| anion binding                       | GO:0043168        | 161         | 28          | 3.48        | 8.88E-07        |
| ion binding                         | GO:0043167        | 289         | 34          | 2.35        | 1.90E-04        |
| <b>catalytic activity</b>           | <b>GO:0003824</b> | <b>420</b>  | <b>38</b>   | <b>1.81</b> | <b>1.93E-02</b> |

Table S6. Germination rate and RNA quality of seed lots used for RNA oxidation measurements. Germination rates were measured in 2017. RNA data show the mean  $\pm$  SD ( $n = 5$ ) of RNA extracted from six pooled embryonic axes. RNA yield,  $\mu\text{g RNA mg}^{-1}$  sample tissue. Different letters indicate  $P < 0.05$  (Tukey's HSD).

| Harvest year | Germination % | RNA yield                    | RIN                           |
|--------------|---------------|------------------------------|-------------------------------|
| 2015         | 100           | 5.81 $\pm$ 1.58 <sup>a</sup> | 7.72 $\pm$ 0.33 <sup>a</sup>  |
| 1999         | 90            | 5.16 $\pm$ 1.21 <sup>a</sup> | 7.22 $\pm$ 0.19 <sup>ab</sup> |
| 1995         | 28            | 3.43 $\pm$ 0.91 <sup>a</sup> | 6.74 $\pm$ 0.05 <sup>bc</sup> |
| 1989         | 0             | 2.64 $\pm$ 0.87 <sup>a</sup> | 5.96 $\pm$ 0.18 <sup>c</sup>  |

Table S7. Genes and amplicons chosen for qPCR. Transcripts with similar lengths were selected to represent two regions in Figure 5, region A (“intact”) and region B (“degradation-prone”). MinION sequence data were used to ensure the 5' and 3' amplicons fell within the sequenced portion of the transcript in 2015H samples. %, percent of transcript length to first base of amplicon.

| Transcript category | Transcript ID   | Length (bp) | Location of 5' amplicon (bp) | %    | 5' amplicon length (bp) | Location of 3' amplicon (bp) | %    | 3' amplicon length (bp) |
|---------------------|-----------------|-------------|------------------------------|------|-------------------------|------------------------------|------|-------------------------|
| Intact              | Glyma.09g214400 | 1161        | 215-305                      | 18.5 | 90                      | 749-848                      | 64.5 | 99                      |
|                     | Glyma.02g197300 | 1190        | 204-320                      | 17.1 | 116                     | 789-874                      | 66.3 | 85                      |
|                     | Glyma.11g134200 | 1009        | 241-345                      | 23.9 | 104                     | 655-755                      | 64.9 | 100                     |
| Degradation-prone   | Glyma.10g064400 | 1660        | 325-420                      | 19.6 | 95                      | 1305-1398                    | 78.6 | 93                      |
|                     | Glyma.12g064000 | 2285        | 192-294                      | 8.4  | 102                     | 1861-1961                    | 81.4 | 100                     |
|                     | Glyma.13g119400 | 1953        | 218-313                      | 11.2 | 95                      | 1468-1554                    | 75.2 | 86                      |

Table S8. Primer sequences for each qPCR amplicon. (5'/3'), amplicon occurs at the 5' or 3' end of the transcript.

| Transcript category | Sequence accession number | (5'/3') Forward primer (5' → 3') | Reverse primer (5' → 3')   |
|---------------------|---------------------------|----------------------------------|----------------------------|
| Intact              | Glyma.09g214400           | 5' TTATCCCAAACGGACACTTCC         | GCCAATCGTCTCCTTGTCTT       |
|                     |                           | 3' GCACAAACAAACGCCATCA           | GACTACAAACGTAAGACTTCTAAAGG |
|                     | Glyma.02g197300           | 5' ATAATGATCGACGGAGGAAGC         | CGTGAGGAGGCTCTTGAAAT       |
|                     |                           | 3' ATTAACGGCGGCTTTCACCT          | TTCGCCGGCCGTGTAATC         |
|                     | Glyma.11g134200           | 5' GATGCCAACGGCTCCAA             | TCCGAATCCGAATTCCAAGC       |
|                     |                           | 3' GACTGAACCCAGTGACCAA           | AACAGAGCAGGGTAGGGTAT       |
| Degradation-prone   | Glyma.10g064400           | 5' CGTACAGTACCAGAGAGGTTATTC      | GTGACTTTGAGGCTGATTTGTC     |
|                     |                           | 3' GCAATTGCGGAAACACTGAA          | CATTGACGACACCCTCTTCTT      |
|                     | Glyma.12g064000           | 5' CATAGCCAACGATCAGGGTAAT        | GTTCATAGCGACCTGGTTCTT      |
|                     |                           | 3' GATGGAAACCAACTTGCTGAAG        | CCAGCTCCTTGGTACATCTTT      |
|                     | Glyma.13g119400           | 5' CCAAAGAGGAAGGTCACGATTT        | CGGCTTCTTGTCCCTCTTTAC      |
|                     |                           | 3' GACATAGCAAAGGCTGCAAAG         | CAATTCTCAAAGCTCGGCATC      |

Table S9. Ct values and efficiency calculations for each qPCR primer set. cDNA synthesized from a single 2015H embryonic axis was diluted in a 2x dilution series; RT-qPCR was performed to determine the Ct values for each dilution. Efficiency was calculated as  $10^{-(1/\text{slope})}$ , where the slope was derived from the linear regression of the Ct values for the dilution series for that transcript. E, efficiency.

| Transcript category | Primer set                     | Dilution (log of dilution factor) |       |       |       |       |       |       |       | Linear regression       | R <sup>2</sup> | E    |
|---------------------|--------------------------------|-----------------------------------|-------|-------|-------|-------|-------|-------|-------|-------------------------|----------------|------|
|                     |                                | 0                                 | -0.30 | -0.60 | -0.90 | -1.20 | -1.50 | -1.81 | -2.11 |                         |                |      |
| Intact              | Glyma.09g214400<br>5' amplicon | 25.66                             | 26.28 | 27.29 | 28.47 | 29.29 | 30.27 | 31.10 | 33.16 | $y = -3.4153x + 25.342$ | 0.98           | 1.96 |
|                     | Glyma.09g214400<br>3' amplicon | 24.70                             | 25.38 | 26.36 | 27.30 | 28.22 | 29.39 | 30.05 | 31.64 | $y = -3.2405x + 24.466$ | 0.99           | 2.04 |
|                     | Glyma.02g197300<br>5' amplicon | 26.13                             | 26.88 | 27.83 | 28.91 | 29.92 | 31.12 | 32.21 | 33.42 | $y = -3.5023x + 25.863$ | 1.00           | 1.93 |
|                     | Glyma.02g197300<br>3' amplicon | 25.70                             | 26.32 | 27.31 | 28.23 | 29.35 | 29.75 | 31.03 | 32.29 | $y = -3.0894x + 25.493$ | 0.99           | 2.11 |
|                     | Glyma.11g134200<br>5' amplicon | 24.19                             | 24.84 | 25.59 | 26.69 | 27.60 | 28.50 | 29.44 | 30.58 | $y = -3.0597x + 23.955$ | 1.00           | 2.12 |
|                     | Glyma.11g134200<br>3' amplicon | 23.01                             | 23.97 | 24.68 | 25.56 | 26.60 | 27.39 | 28.28 | 29.60 | $y = -3.0392x + 22.934$ | 1.00           | 2.13 |
| Degradation-prone   | Glyma.10g064400<br>5' amplicon | 20.79                             | 21.59 | 22.43 | 24.20 | 24.37 | 25.51 | 26.42 | 27.61 | $y = -3.2152x + 20.728$ | 0.99           | 2.05 |
|                     | Glyma.10g064400<br>3' amplicon | 19.74                             | 20.47 | 21.35 | 22.34 | 23.31 | 24.38 | 25.41 | 26.51 | $y = -3.2488x + 19.516$ | 1.00           | 2.03 |
|                     | Glyma.12g064000<br>5' amplicon | 24.05                             | 24.82 | 25.63 | 26.82 | 27.50 | 28.69 | 29.67 | 30.76 | $y = -3.2065x + 23.864$ | 1.00           | 2.05 |
|                     | Glyma.12g064000<br>3' amplicon | 23.40                             | 24.32 | 25.14 | 26.14 | 27.23 | 28.13 | 29.26 | 30.10 | $y = -3.2294x + 23.313$ | 1.00           | 2.04 |
|                     | Glyma.13g119400<br>5' amplicon | 21.46                             | 22.44 | 23.37 | 24.36 | 25.25 | 26.18 | 27.39 | 28.14 | $y = -3.1966x + 21.456$ | 1.00           | 2.06 |
|                     | Glyma.13g119400<br>3' amplicon | 19.81                             | 20.77 | 21.60 | 22.62 | 23.56 | 24.73 | 25.54 | 26.68 | $y = -3.2535x + 19.736$ | 1.00           | 2.03 |

Protocol S1. Detailed description of Oxford Nanopore cDNA synthesis and sequencing library preparation.

### *Synthesis of cDNA for sequencing*

Reagents were supplied by Invitrogen unless otherwise noted. Reverse transcription reactions consisted of 17 ng of template RNA, 1  $\mu$ L of a 1:50 dilution of ERCC RNA Spike-In Mix (Ambion), 2  $\mu$ L of 1  $\mu$ M poly(T)-VN primer (5' phosphate/ACTTGCCTGTCGCTCTATCTTCT<sub>20</sub>VN, Integrated DNA Technologies), 1  $\mu$ L of 10 mM dNTPs, and nuclease-free water up to a final reaction volume of 11  $\mu$ L. Reactions incubated at 65 °C for 5 min were snap-cooled in a pre-chilled metal tube rack for 1 min, followed by addition of 4  $\mu$ L of RT buffer, 1  $\mu$ L of 100 mM DTT, 40 U of RNase OUT, and 2  $\mu$ L of 10  $\mu$ M strand-switching primer (TTTCTGTTGGTGCTGATATTGCTGCCATTACGGCCmGmGmG, Integrated DNA Technologies). Reactions were then incubated at 42 °C for 2 min, followed by the addition of 200 U of SuperScript® IV Reverse Transcriptase. Reverse transcription occurred at 50 °C for 10 min, followed by strand-switching at 42 °C for 10 min and heat inactivation at 80 °C for 10 min. The resulting cDNA was purified with 14  $\mu$ L of Agencourt AMPure XP beads (Beckman), washing three times with freshly prepared 80% ethanol and eluting in 21  $\mu$ L of nuclease-free water after a 10 min incubation at 22 °C on a Hula Mixer (Invitrogen).

### *Library barcoding, pooling, and sequencing prep*

Unique barcodes (Oxford Nanopore Technologies, EXP-PBC001) were added to each sample during cDNA amplification according to the Oxford Nanopore recommended protocol. The barcoding reaction consisted of 20  $\mu$ L reverse transcription reaction, 2  $\mu$ L of barcode primer, 8  $\mu$ L of nuclease-free water, and 30  $\mu$ L of LongAmp Taq 2x MasterMix (New England Biolabs). Samples underwent PCR as follows: initial denaturation at 95 °C for 3 min, 18 cycles of 95 °C for 15s, 62 °C for 15s, 65 °C for 100s, final extension at 65 °C for 10 min. Amplified cDNA was purified with 108  $\mu$ L of Agencourt AMPure XP beads, washing twice with freshly prepared 80% ethanol and eluting in 22  $\mu$ L of nuclease-free water. Samples were combined into two pools, each

containing 1 µg of cDNA in 45 µL (200 ng of cDNA from each of five samples). The first pool included two 1994H and three 2015H samples, while the second pool included three 1994H and two 2015H samples.

Each pooled cDNA library was prepared for sequencing with the NEBNext End repair/dA-tailing module (New England Biolabs) in a 60 µL reaction that included 5 µL of a control DNA strand supplied by Oxford Nanopore Technologies, 7 µL of Ultra II End-prep reaction buffer, and 3 µL of Ultra II End-prep enzyme mix. Reactions were incubated for 5 min at 20 °C, followed by 5 min at 65 °C. Enzymes were removed by binding the cDNA to 60 µL Agencourt AMPure XP beads, washing twice with freshly prepared 80% ethanol, and then eluting in 31 µL of nuclease-free water after a 10 min incubation at 22 °C. Oxford Nanopore Technologies adapters were ligated to 10 µL of end-prepped cDNA in a 100 µL reaction containing 20 µL of adapter mix AMX1D (Oxford Nanopore Technologies) and 50 µL of Blunt/TA Ligase Master Mix (New England Biolabs). The reaction was then incubated for 10 min at 22 °C. Libraries were purified once again using 40 µL of Agencourt AMPure XP beads but washed twice with 140 µL of Adapter Bead Binding buffer (Oxford Nanopore Technologies), and eluted in 15 µL of Elution Buffer (Oxford Nanopore Technologies) after 10 min incubation at 22 °C on a Hula Mixer. Libraries were mixed with 35 µL of Running Buffer with Fuel Mix (RBF, Oxford Nanopore Technologies) and 25.5 µL of Library Loading Beads (Oxford Nanopore Technologies). Each library was sequenced on a MinION SpotON Flow Cell MK I (R9.4) (Oxford Nanopore Technologies). Flow cells were primed by loading 800 µL of priming mix (480 µL of RBF and 520 µL of nuclease-free water) into the priming port. After 5 min of priming, the SpotON sample port was opened and 200 µL of priming mix was loaded into the priming port, followed immediately by 75 µL of thoroughly mixed library added dropwise to the sample port. The SpotON sample port was closed and sequencing was initiated with the sequencing script "NC\_48Hr\_Sequencing\_Run\_FLO-MIN106\_SQK-LSK108" in MinKNOW 1.4.2.
